# Supplementary material
Source: Elsevier journal article supplement (https://rcastoragev2.blob.core.windows.net/ea9e11627160e3a7daca0d40f754d060/mmc1.pdf)
Supplement: mmc1 [file mmc1.pdf]

**Cell Reports, Volume 40**

**Supplemental information**

**Topoisomerase 1-dependent**

**R-loop deficiency drives**

**accelerated replication and genomic instability**

**Dan Sarni, Sonia Barroso, Alon Shtrikman, Michal Irony-Tur Sinai, Yifat S. Oren, Andrés Aguilera, and Batsheva Kerem**

# Supplementary Figure 1

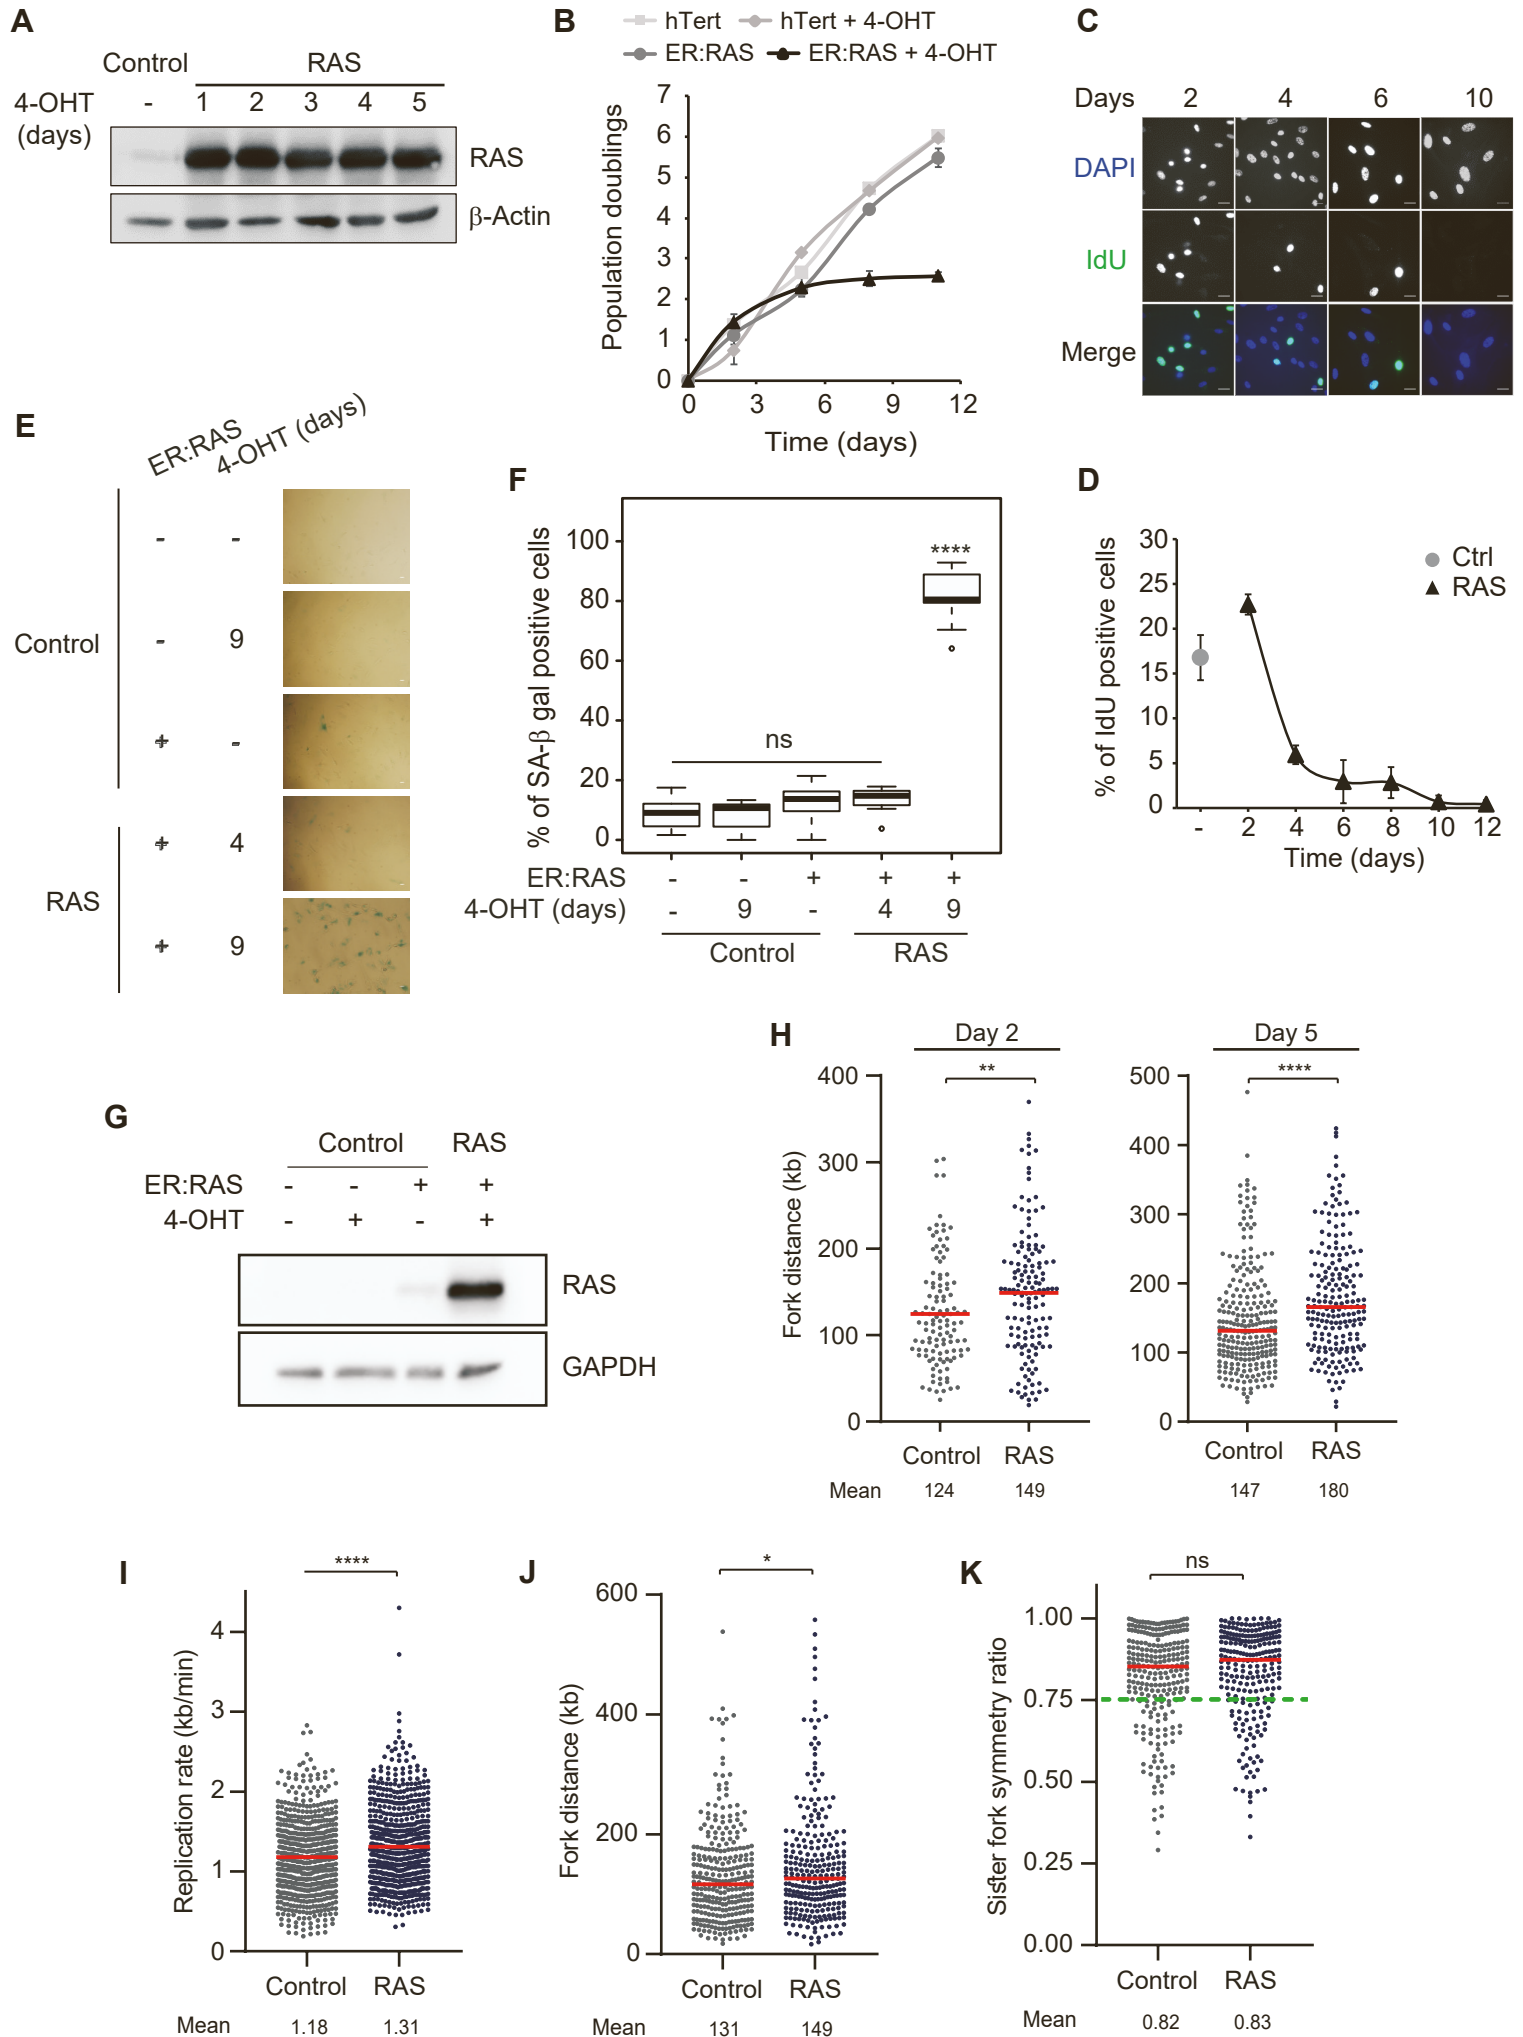

**Supplementary Figure 1. Related to Figure 1. RAS expression increases replication rate and induces senescence.** (A) Protein levels of HRAS and  $\beta$ -Actin in ER:RAS infected FSE-hTert cells with (RAS) or without (Control) 4-OHT treatment at the indicated time points

(days). (B) Quantification of population doublings at the indicated time points in: FSE-hTert cells (hTert,  $n = 4$ ); FSE-hTert with 4-OHT treatment (hTert + 4-OHT,  $n = 2$ ); FSE-hTert with ER:RAS infection, without 4-OHT treatment (ER:RAS,  $n = 4$ ); FSE-hTert with ER:RAS infection and 4-OHT treatment (ER:RAS + 4-OHT,  $n = 4$ ).  $n$  represents the number of independent experiments; data are mean  $\pm$  SEM. (C) Representative images of IdU (green) and DAPI staining (blue) in RAS-expressing cells at the indicated time points. (D) Quantification of the percent of control (Ctrl) and RAS nuclei positive for IdU incorporation at the indicated time points (days post RAS activation). Data are mean  $\pm$  SEM from two independent experiments. (E) Representative images of senescence associated  $\beta$ -gal activity; positive cells are stained blue. (F) Quantification of senescence associated  $\beta$ -gal activity in FSE-hTert cells with (+) or without (-) ER:RAS infection and 4-OHT treatment at the indicated time points (days). Data are the summary of two independent experiments.  $P$  values calculated compared to FSE-hTert cells without ER:RAS infection nor 4-OHT treatment. (G) Protein levels of HRAS and GAPDH in WI38-hTert cells with (+) or without (-) ER:RAS infection and 4-OHT treatment as indicated. (H) Fork distances (kb) in control and RAS-expressing ER:RAS FSE hTert cells for 2 or 5 days; at least 110 fibers per condition were analyzed. (I) Fork rates (kb/min) in WI38-hTert infected with ER:RAS without (Control) or with (RAS) 4-OHT treatment for 5 days; at least 600 fibers per condition were analyzed. (J) Fork distances (kb) in Control and RAS WI-38 cells; at least 260 fibers per condition were analyzed. (K) Sister fork symmetry in Control and RAS WI-38 cells; at least 230 fibers per condition were analyzed. Dashed green line indicate asymmetry ratio threshold. (H-K) Red lines indicate medians, means are indicated. (I-K) Data are the summary of two independent experiments, (H) Data for RAS day 2 are the summary of 2 independent experiments; data for RAS day 5 are the summary of 4 independent experiments. Mann-Whitney rank-sum test, ns - nonsignificant; \*  $P < 0.05$ ; \*\*  $P < 0.01$ ; \*\*\*\*  $P < 0.0001$ . Scale bars, 20  $\mu$ m.

Supplementary Figure 2

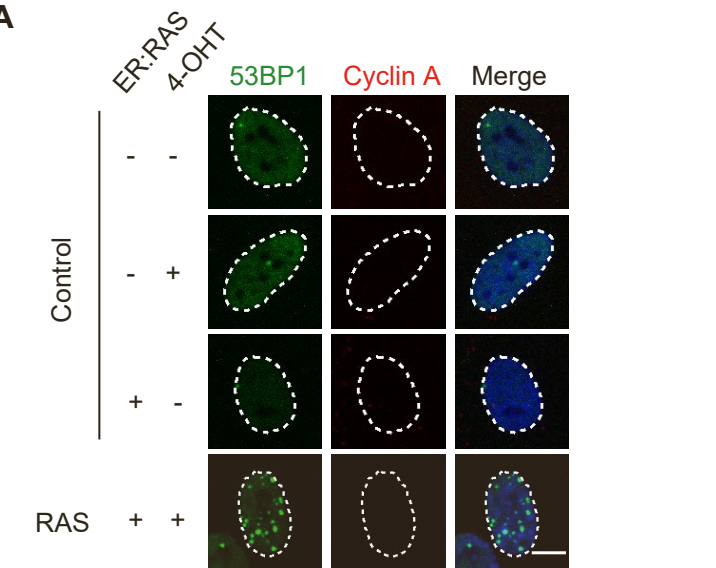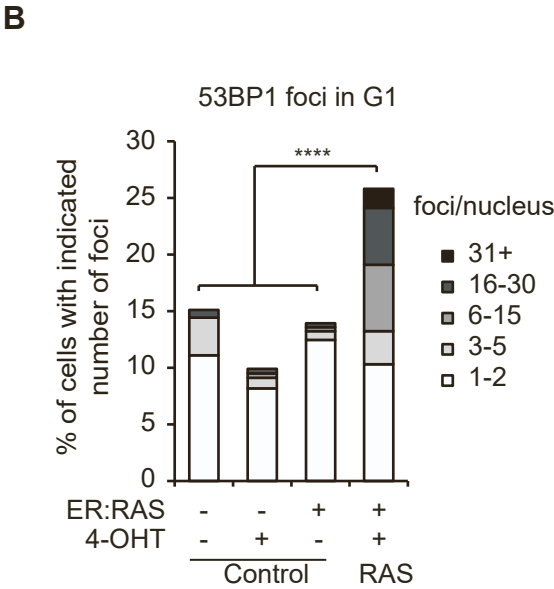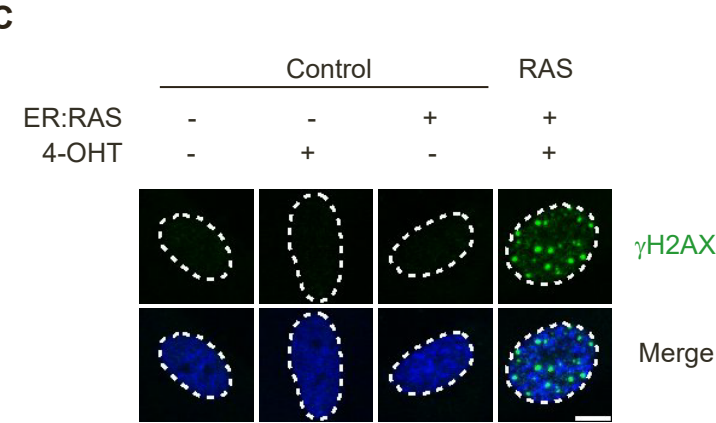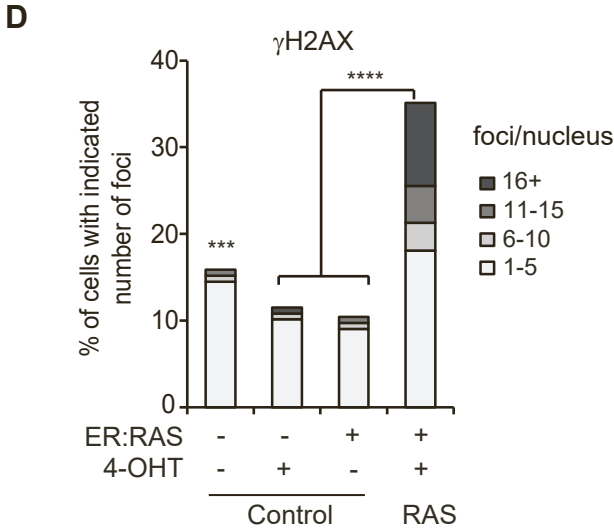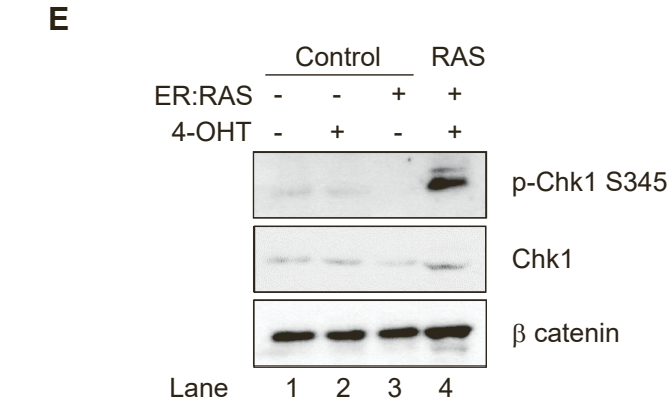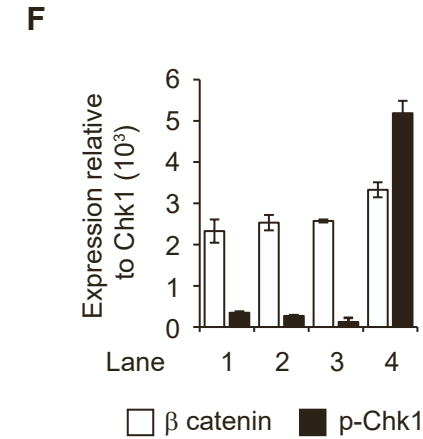

**Supplementary Figure 2. Related to Figure 1. RAS expression leads to replication-induced DNA damage.**

(**A,B**) 53BP1 foci in G1-phase (cyclin A negative) in FSE-hTert cells with (+) or without (-) ER:RAS infection and 4-OHT treatment as indicated. Representative images of 53BP1 foci (green) in cyclin A (red) negative cells and DAPI staining (blue) (**A**). Percentage of cells with indicated number of foci per nucleus (**B**); at least 85 nuclei per condition were analyzed. Only foci smaller than 1  $\mu\text{m}$  in diameter were scored. *P* values calculated compared to ER:RAS FSE-hTert cells treated with 4-OHT (RAS). Data are representative of three independent experiments with similar results. (**C,D**)  $\gamma\text{H2AX}$  foci in FSE-hTert cells as indicated in **A**. Representative images of  $\gamma\text{H2AX}$  foci (green) and DAPI staining (blue) (**C**). Percentage of cells with the indicated number of  $\gamma\text{H2AX}$  foci (**D**); at least 90 nuclei per condition were analyzed. *P* values calculated compared to ER:RAS FSE-hTert cells treated with 4-OHT (RAS). Data are representative of two independent experiments with similar results. (**E**) Protein levels of phosphorylated Chk1 ser345, Chk1 and  $\beta$ -catenin in FSE-hTert cells with (+) or without (-) ER:RAS infection and 4-OHT treatment as indicated. (**F**) Quantification of protein levels presented in **E**, normalized to Chk1. Mann Whitney rank-sum test, \*\*\* *P* < 0.001; \*\*\*\* *P* < 0.0001. Scale bars, 10  $\mu\text{m}$ .

# Supplementary Figure 3

**A**

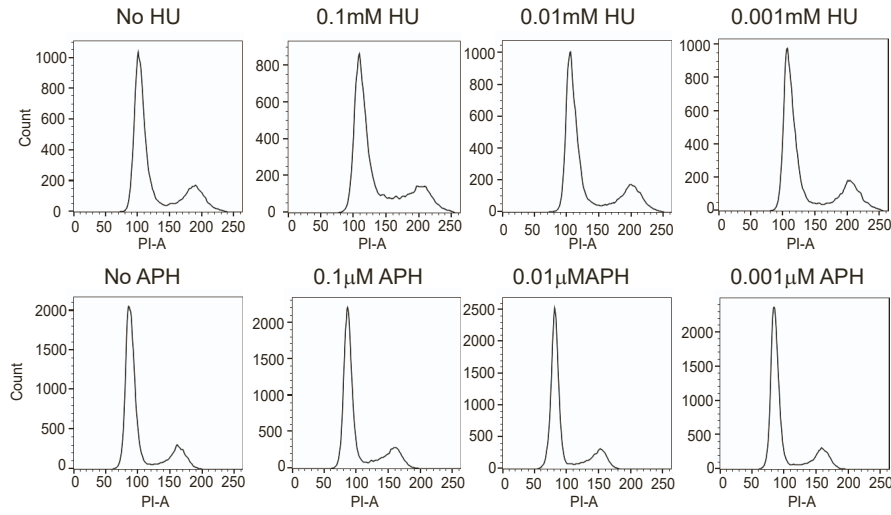

**B**

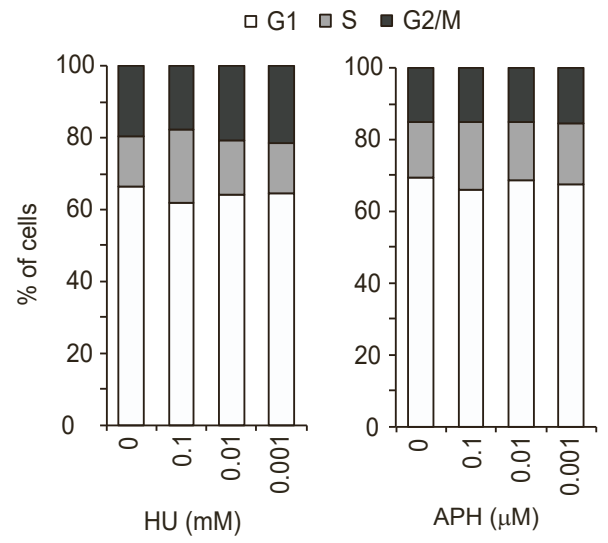

**C**

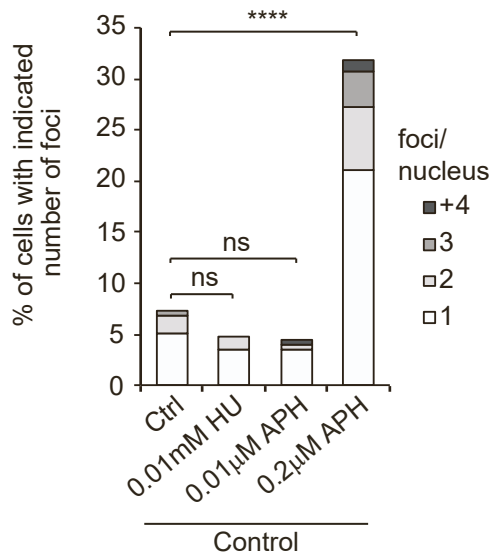

**D**

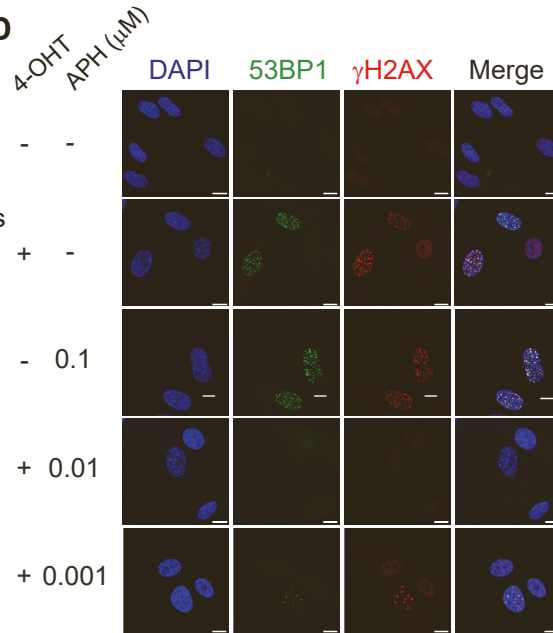

**E**

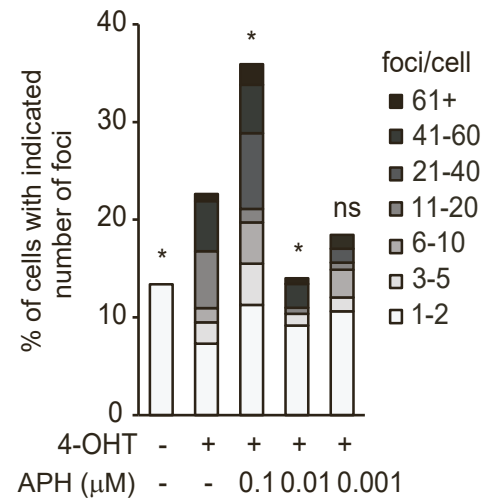

**F**

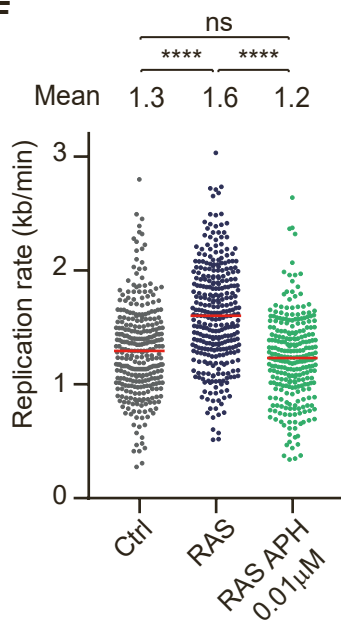

**G**

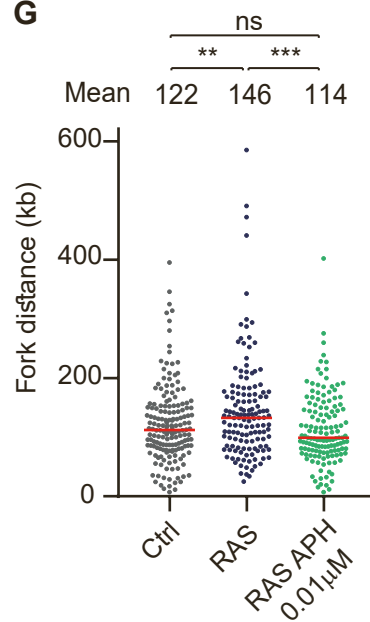

**H**

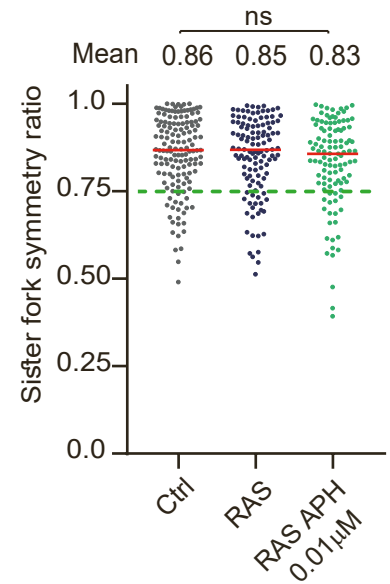

**Supplementary Figure 3. Related to Figure 2. Mild replication inhibition does not affect cell cycle progression and restores normal replication dynamics.** (A) Flow cytometry analysis of ER:RAS FSE-hTet cells treated with 4-OHT and HU or APH as indicated. (B) Quantification of data presented in A. Data are representative of two independent experiments. (C) Percentage of cells with the indicated number of co-localized  $\gamma$ H2AX and 53BP1 foci in ER:RAS infected FSE-hTert cells without 4-OHT treatment (control), treated with HU and APH as indicated. Cells treated with 0.2 $\mu$ M APH as a control, using a high APH concentration that generates DNA damage. Data are the summary of two independent experiments. (D,E) Co-localization of  $\gamma$ H2AX (red) and 53BP1 (green) foci in ER:RAS FSE-hTert cells with (+) or without (-) 4-OHT and APH treatment at the indicated concentrations. Representative images (D), percentage of cells with indicated number of foci (E); at least 140 nuclei per condition were analyzed. Data are representative of two independent experiments with similar results. *P* values calculated compared to ER:RAS FSE-hTert cells treated with 4-OHT (+) but without APH (-) (RAS). (F-H) DNA combing analysis of ER:RAS FSE-hTert cells with (+) or without (-) 4-OHT and APH treatments as indicated. (F) Fork rates (kb/min); at least 270 fibers per condition were analyzed. (G) Fork distances (kb); at least 130 forks per condition were analyzed. (H) Sister fork symmetry ratios; at least 110 forks per condition were analyzed. Red lines indicate medians. (H) Dashed green line indicates asymmetry ratio threshold. Data are the summary of two independent experiments. *P* values calculated by one-way ANOVA (F-H) and by Mann Whitney rank-sum test (E), ns - nonsignificant; \* *P* < 0.05, \*\* *P* < 0.01, \*\*\* *P* < 0.001, \*\*\*\* *P* < 0.0001. Scale bars, 10  $\mu$ m.

Supplementary Figure 4

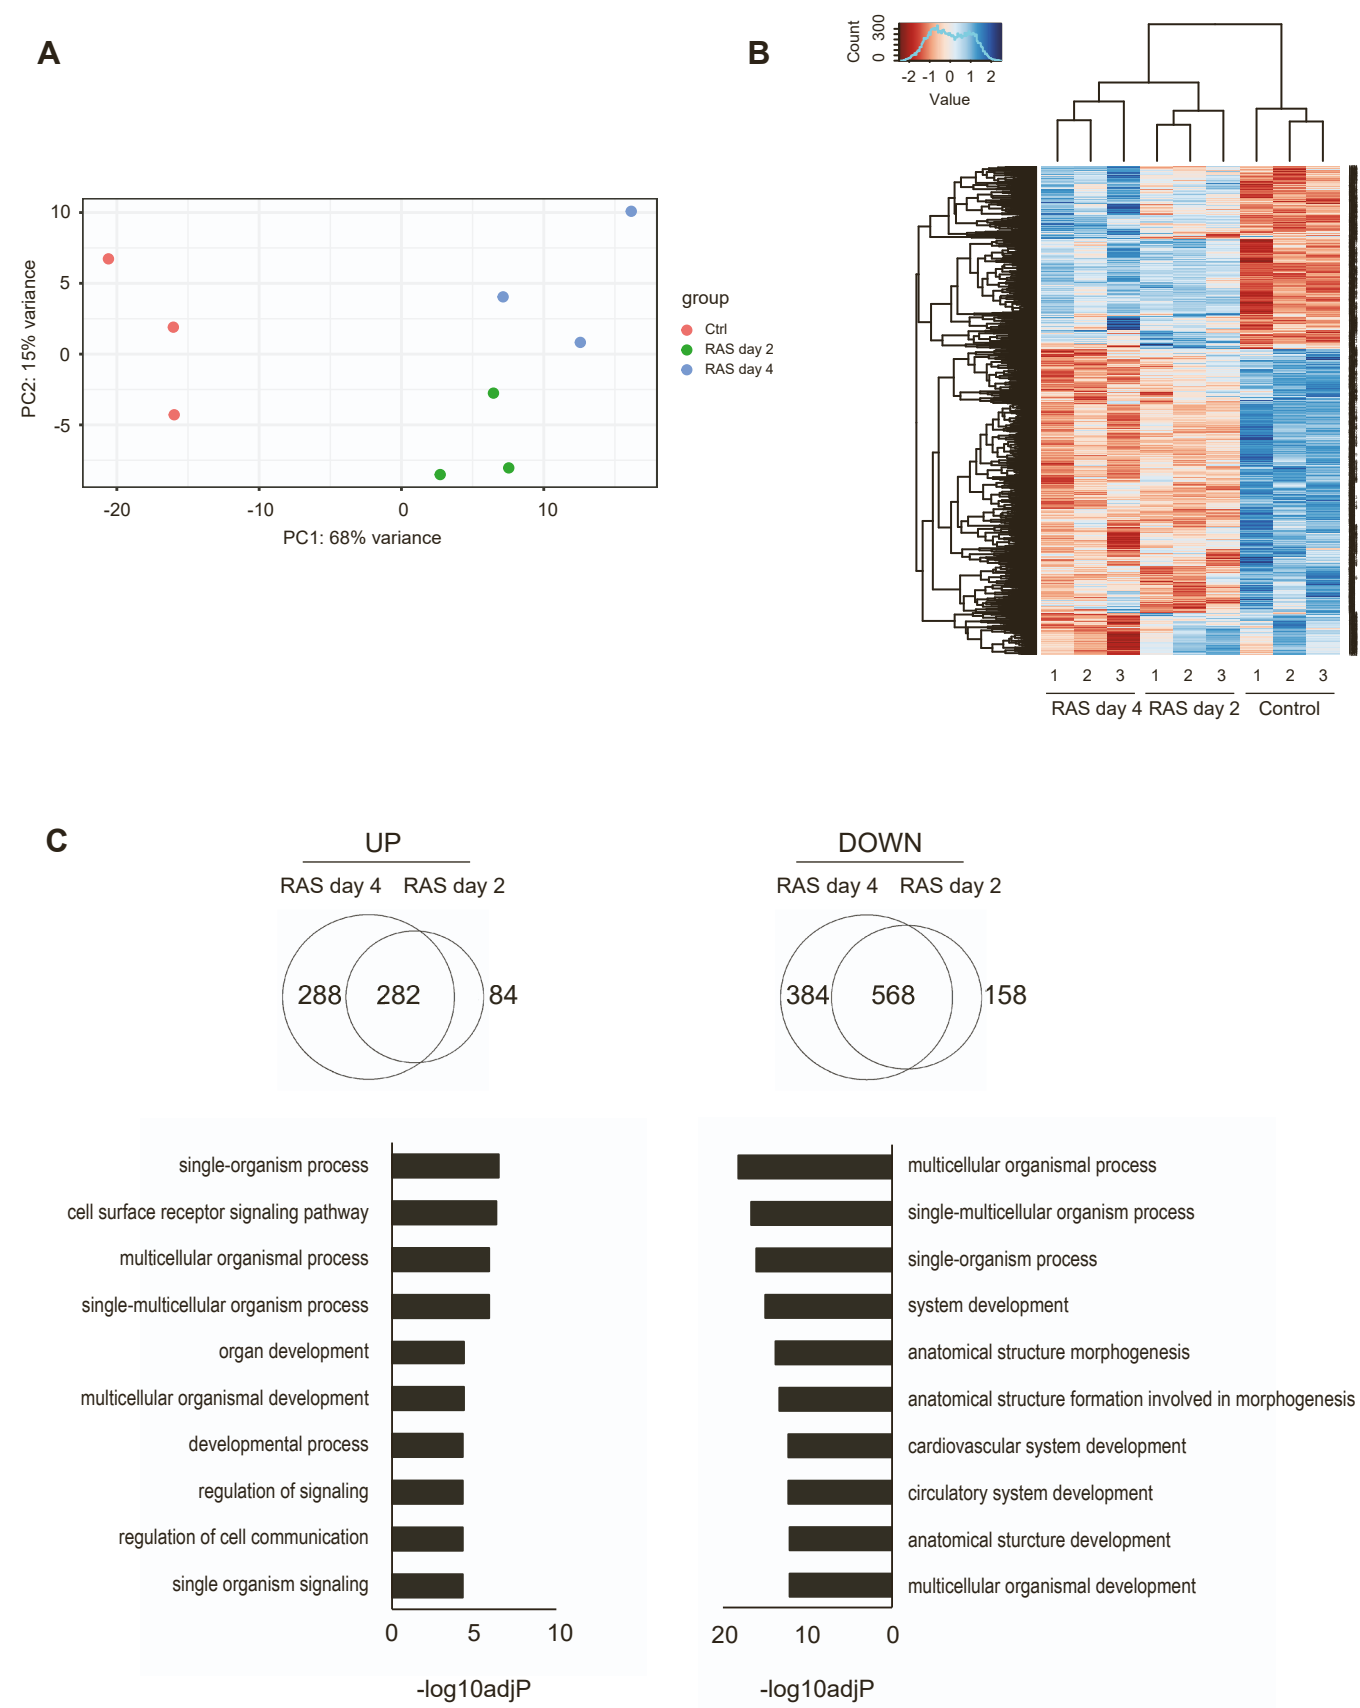



**Supplementary Figure 4. Related to Figure 3. RNA-seq analysis of RAS-expressing cells.** (A) Principal component analysis (PCA) plot of gene expression data showing the 1st and 2nd principal components for control (red), RAS day 2 (green) and RAS day 4 (blue). (B) Hierarchical clustering heat map for differentially expressed genes (DEGs) between RAS-expressing cells for 2 or 4 days (RAS day 2 and RAS day 4, respectively) and control cells. The Z-score centered log<sub>2</sub>-transformed gene in each sample is presented using a color scale. Three independent biological replicates are presented (1-3). (C) Top: Venn diagrams of upregulated (UP) or downregulated (DOWN) DEGs after RAS activation, showing overlap between RAS day 2 and RAS day 4. Bottom: Gene ontology (GO) term analyses of DEGs shared by RAS day 2 and RAS day 4. The top 10 enriched biological processes are shown.

Supplementary Figure 5

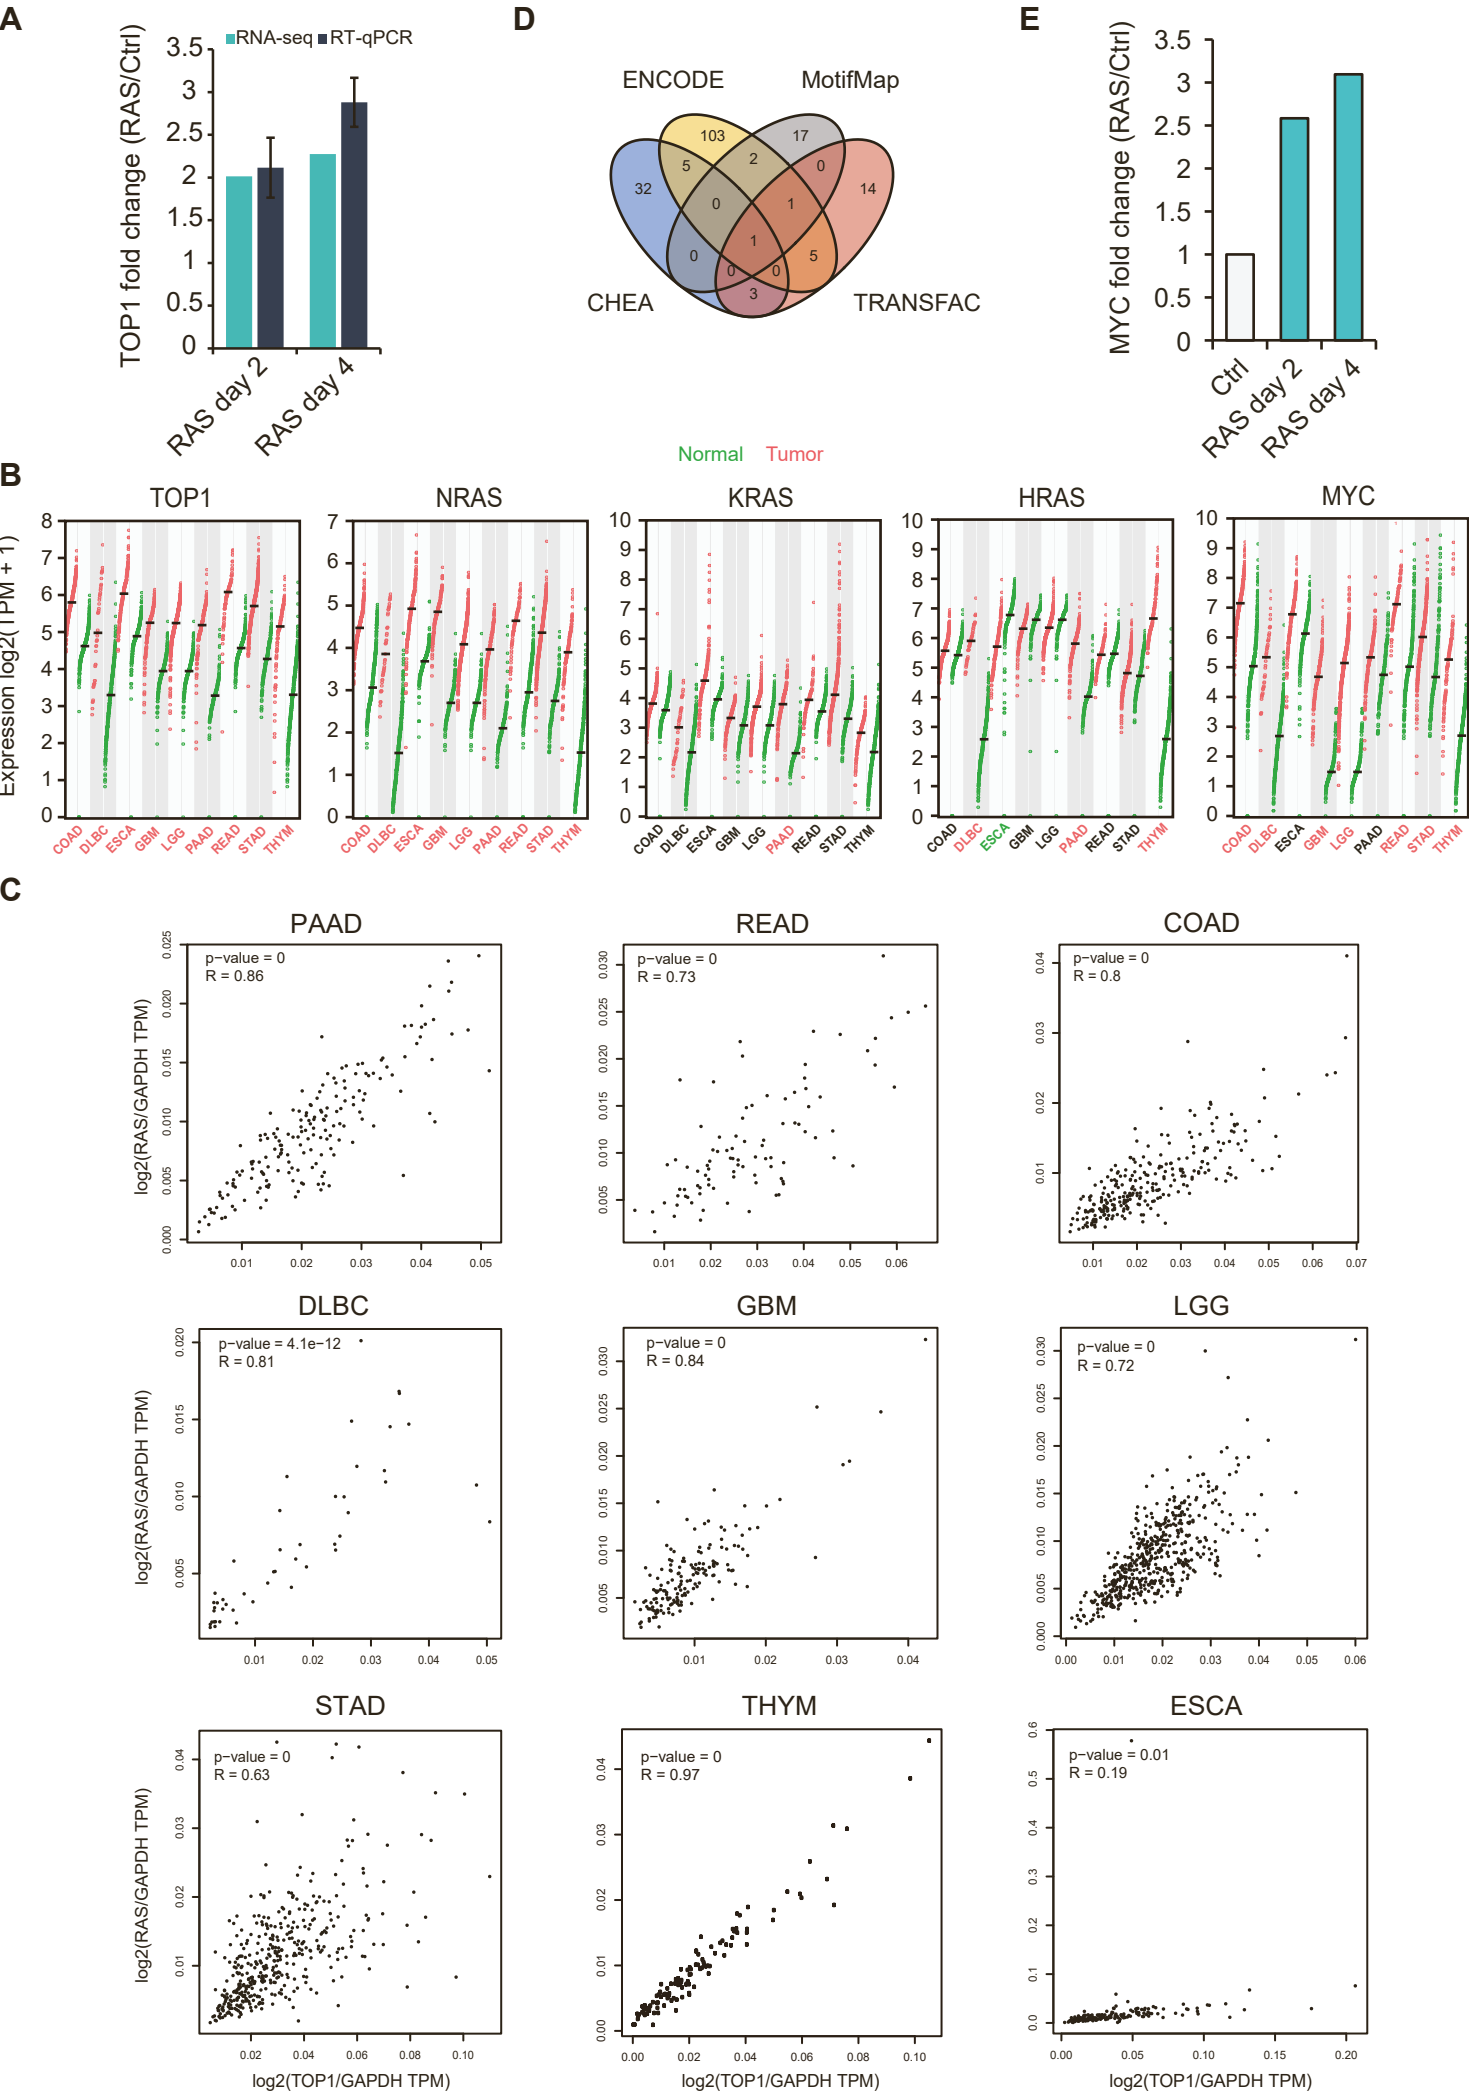

**Supplementary Figure 5. Related to Figure 3. Elevated expression of TOP1 and RAS correlate in cancers.** (A) RNA-seq and RT-qPCR analyses of TOP1 in ER:RAS FSE-hTert cells treated with 4-OHT for 2 and 4 days (RAS day 2 and RAS day 4, respectively) relative to non-treated cells. For the RT-qPCR analysis, the values were normalized to those of RNA polymerase II and are the average fold change (mean  $\pm$  SEM, n = 3). (B) Expression levels  $\log_2(\text{TPM} + 1)$  of TOP1, NRAS, KRAS, HRAS and MYC in tumor samples (red dots) and tissue matching normal samples (green dots) from 9 cancers, as indicated. Color coding differential expression in tumors types compared with normal samples: red – significantly upregulated; green – significantly downregulated; black – no significant change. ANOVA p-value cutoff < 0.01. (C) Scatter plots of expression (TPM) correlation between TOP1 and NRAS normalized to GAPDH in tumor samples, as indicated. Pearson's correlation coefficient is presented. (D) Venn diagram of transcription factors binding the promoter of TOP1. (E) RNA-seq analysis of MYC fold change in cells as indicated in A.

### Supplementary Figure 6

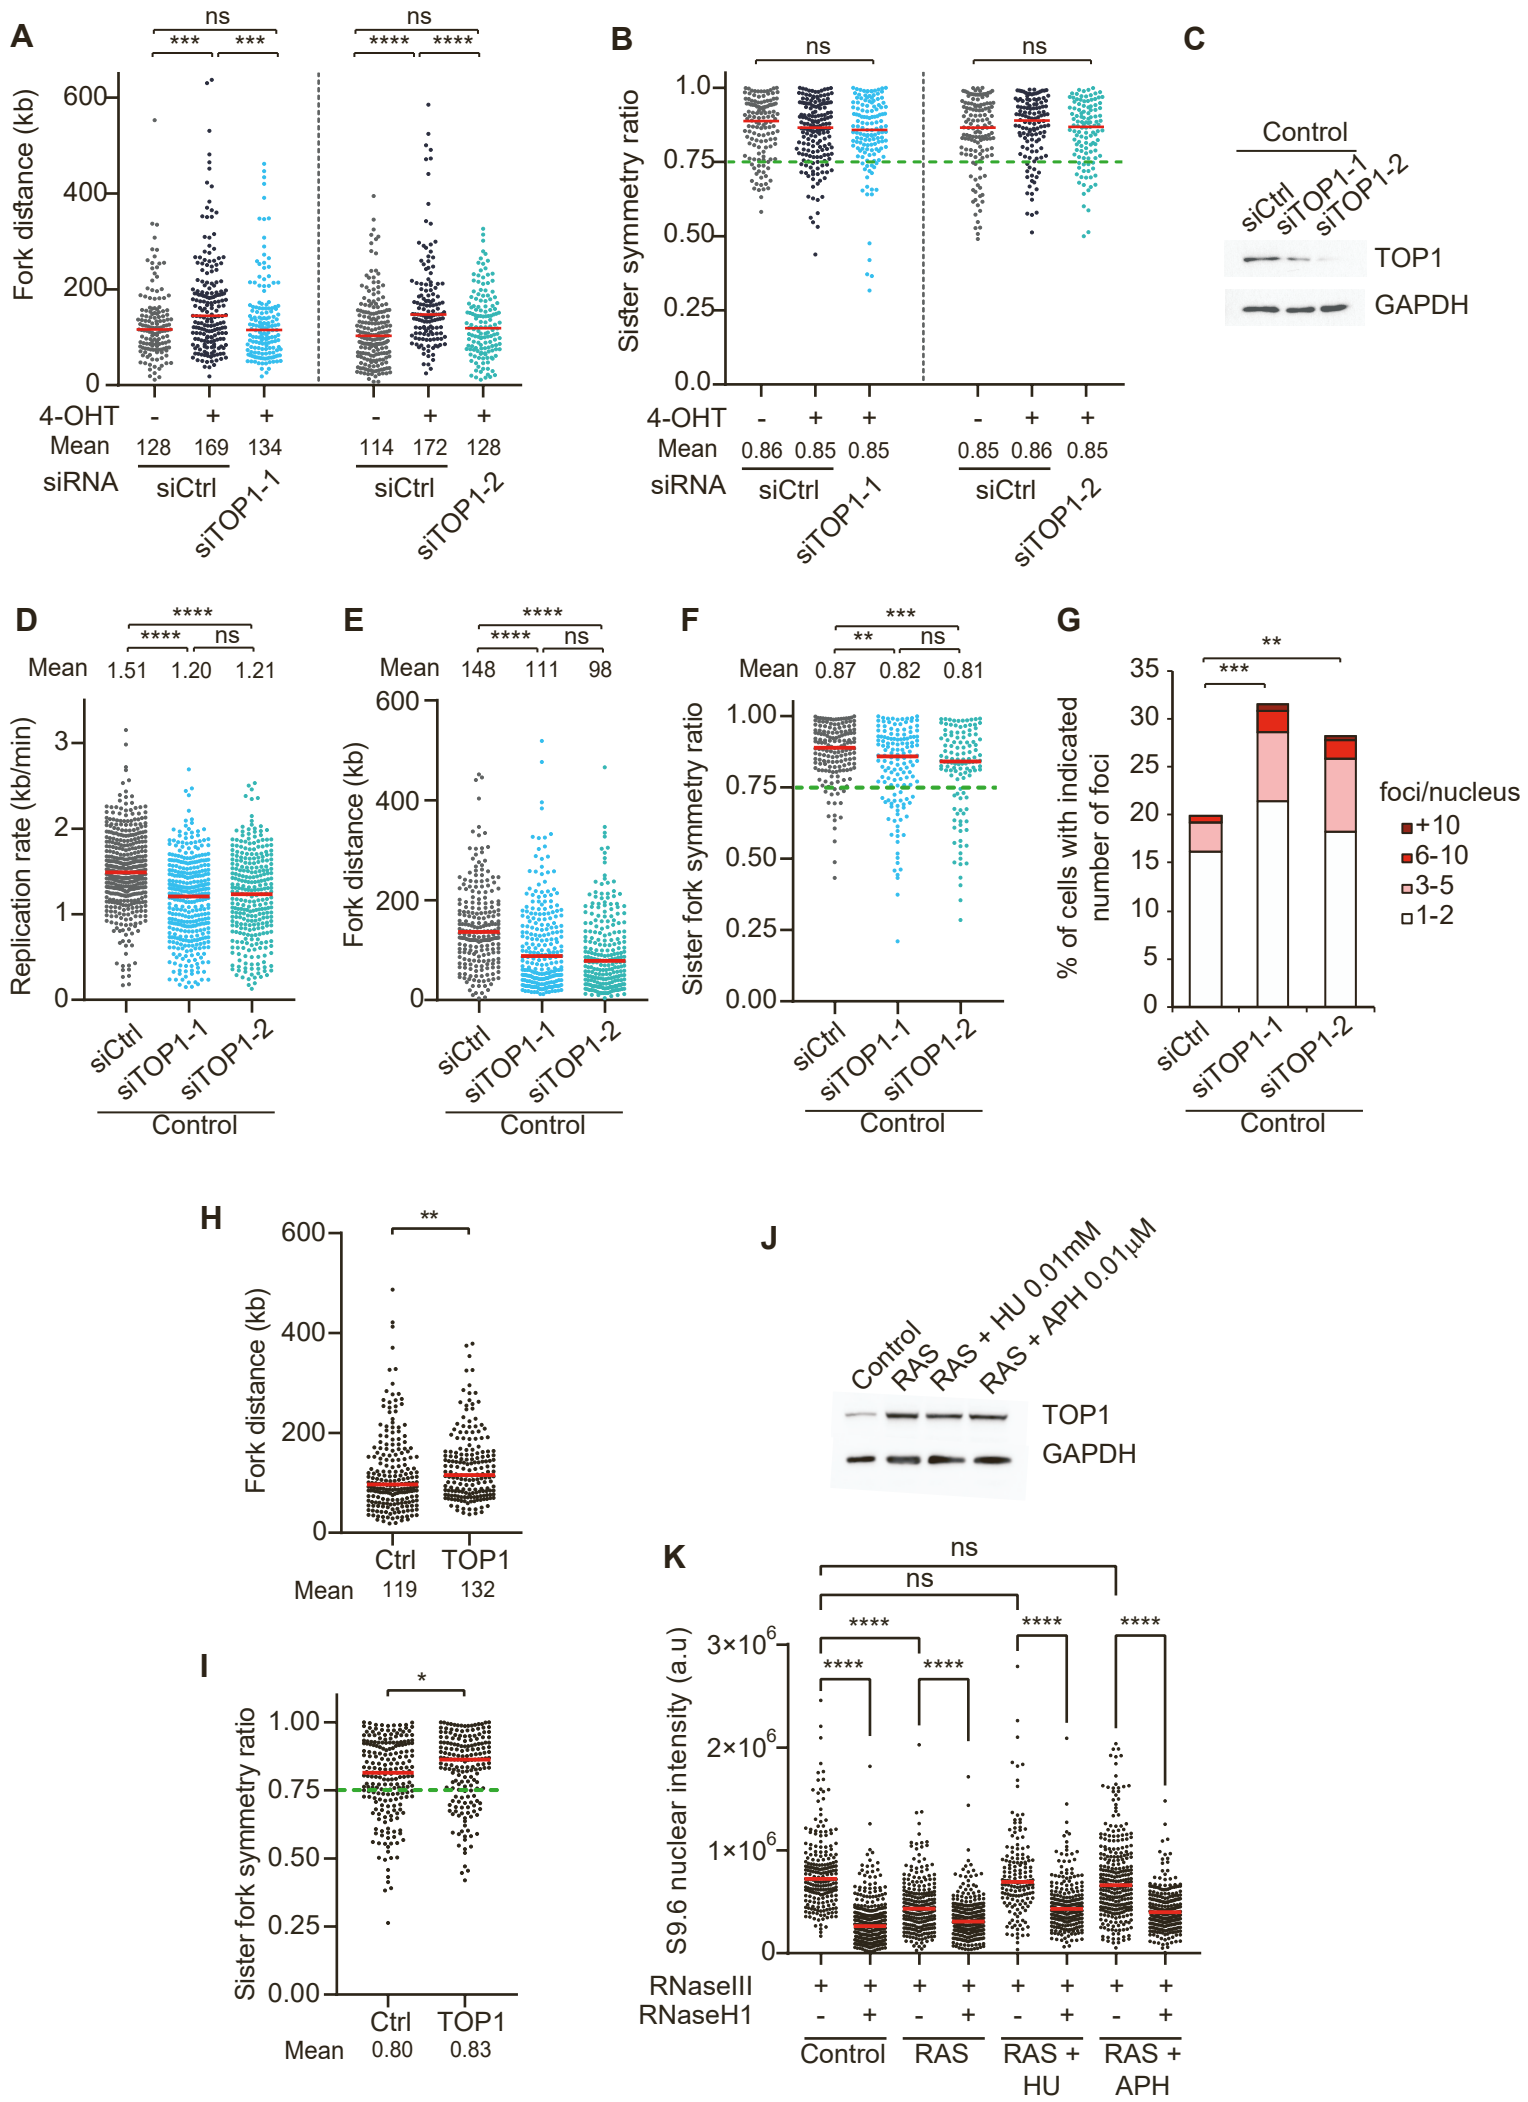

**Supplementary Figure 6. Related to Figure 3. Downregulation or elevated TOP1 promotes aberrant replication dynamics.**

**(A,B)** DNA combing analysis of ER:RAS FSE hTert cells with (+) or without (-) 4-OHT treatment and siRNA against TOP1, as indicated. **(A)** Fork distances (kb); at least 140 forks per condition were analyzed. **(B)** Sister fork symmetry ratios; at least 125 forks per condition were analyzed. **(A,B)** Means are indicated; Red lines indicate medians. *P* values calculated by one-way ANOVA. Data are the summary of two independent experiments. **(C)** Protein levels of TOP1 and GAPDH in ER:RAS FSE-hTert cells without 4-OHT treatment (Control), treated with two independent siRNAs against TOP1 (siTOP1-1 and siTOP1-2) and non-targeting siRNA (siCtrl), as indicated. **(D-F)** DNA combing analysis of ER:RAS FSE-hTert cells without 4-OHT (control) as indicated in **C**. **(D)** Fork rate (kb/min); at least 280 fibers per condition were analyzed. **(E)** Fork distances (kb); at least 220 forks per condition were analyzed. **(F)** Sister fork symmetry ratios; at least 120 forks per condition were analyzed. Dashed green line indicates asymmetry ratio threshold **(F)**. Red lines indicate medians. Data are the summary of two independent experiments. **(G)** Percentage of cells with indicated number of co-localized  $\gamma$ H2AX and 53BP1 foci in ER:RAS FSE-hTert cells without 4-OHT treatment (Control) as indicated in **C**. At least 400 nuclei per condition were analyzed. Data are the summary of two independent experiments. *P* values calculated by one-way ANOVA. **(H,I)** DNA combing analysis of HEK-293 cells transfected with a control GFP vector (Control) or with TOP1-GFP (TOP1). **(H)** Fork distances (kb); at least 180 forks per condition were analyzed. **(I)** Sister fork symmetry ratios; at least 180 forks per condition were analyzed, dashed green line indicate asymmetry ratio. Means are indicated; Red lines indicate medians. *P* values calculated by Mann Whitney rank-sum test. Data are the summary of two independent experiments. **(J)** Protein levels of TOP1 and GAPDH in ER:RAS FSE-hTert cells with (RAS) or without (Control) 4-OHT treatment, HU and APH treatments as indicated. **(K)** Mean nuclear fluorescence intensity of RNA-DNA hybrid antibody (S9.6) in individual nuclei in ER:RAS FSE hTert cells with (RAS) or without (Control) 4-OHT treatment, HU/APH, RNaseIII and RNaseH1 treatments as indicated. ns – non-significant; \* *P* < 0.05; \*\* *P* < 0.01; \*\*\* *P* < 0.001; \*\*\*\* *P* < 0.0001.

Supplementary Figure 7

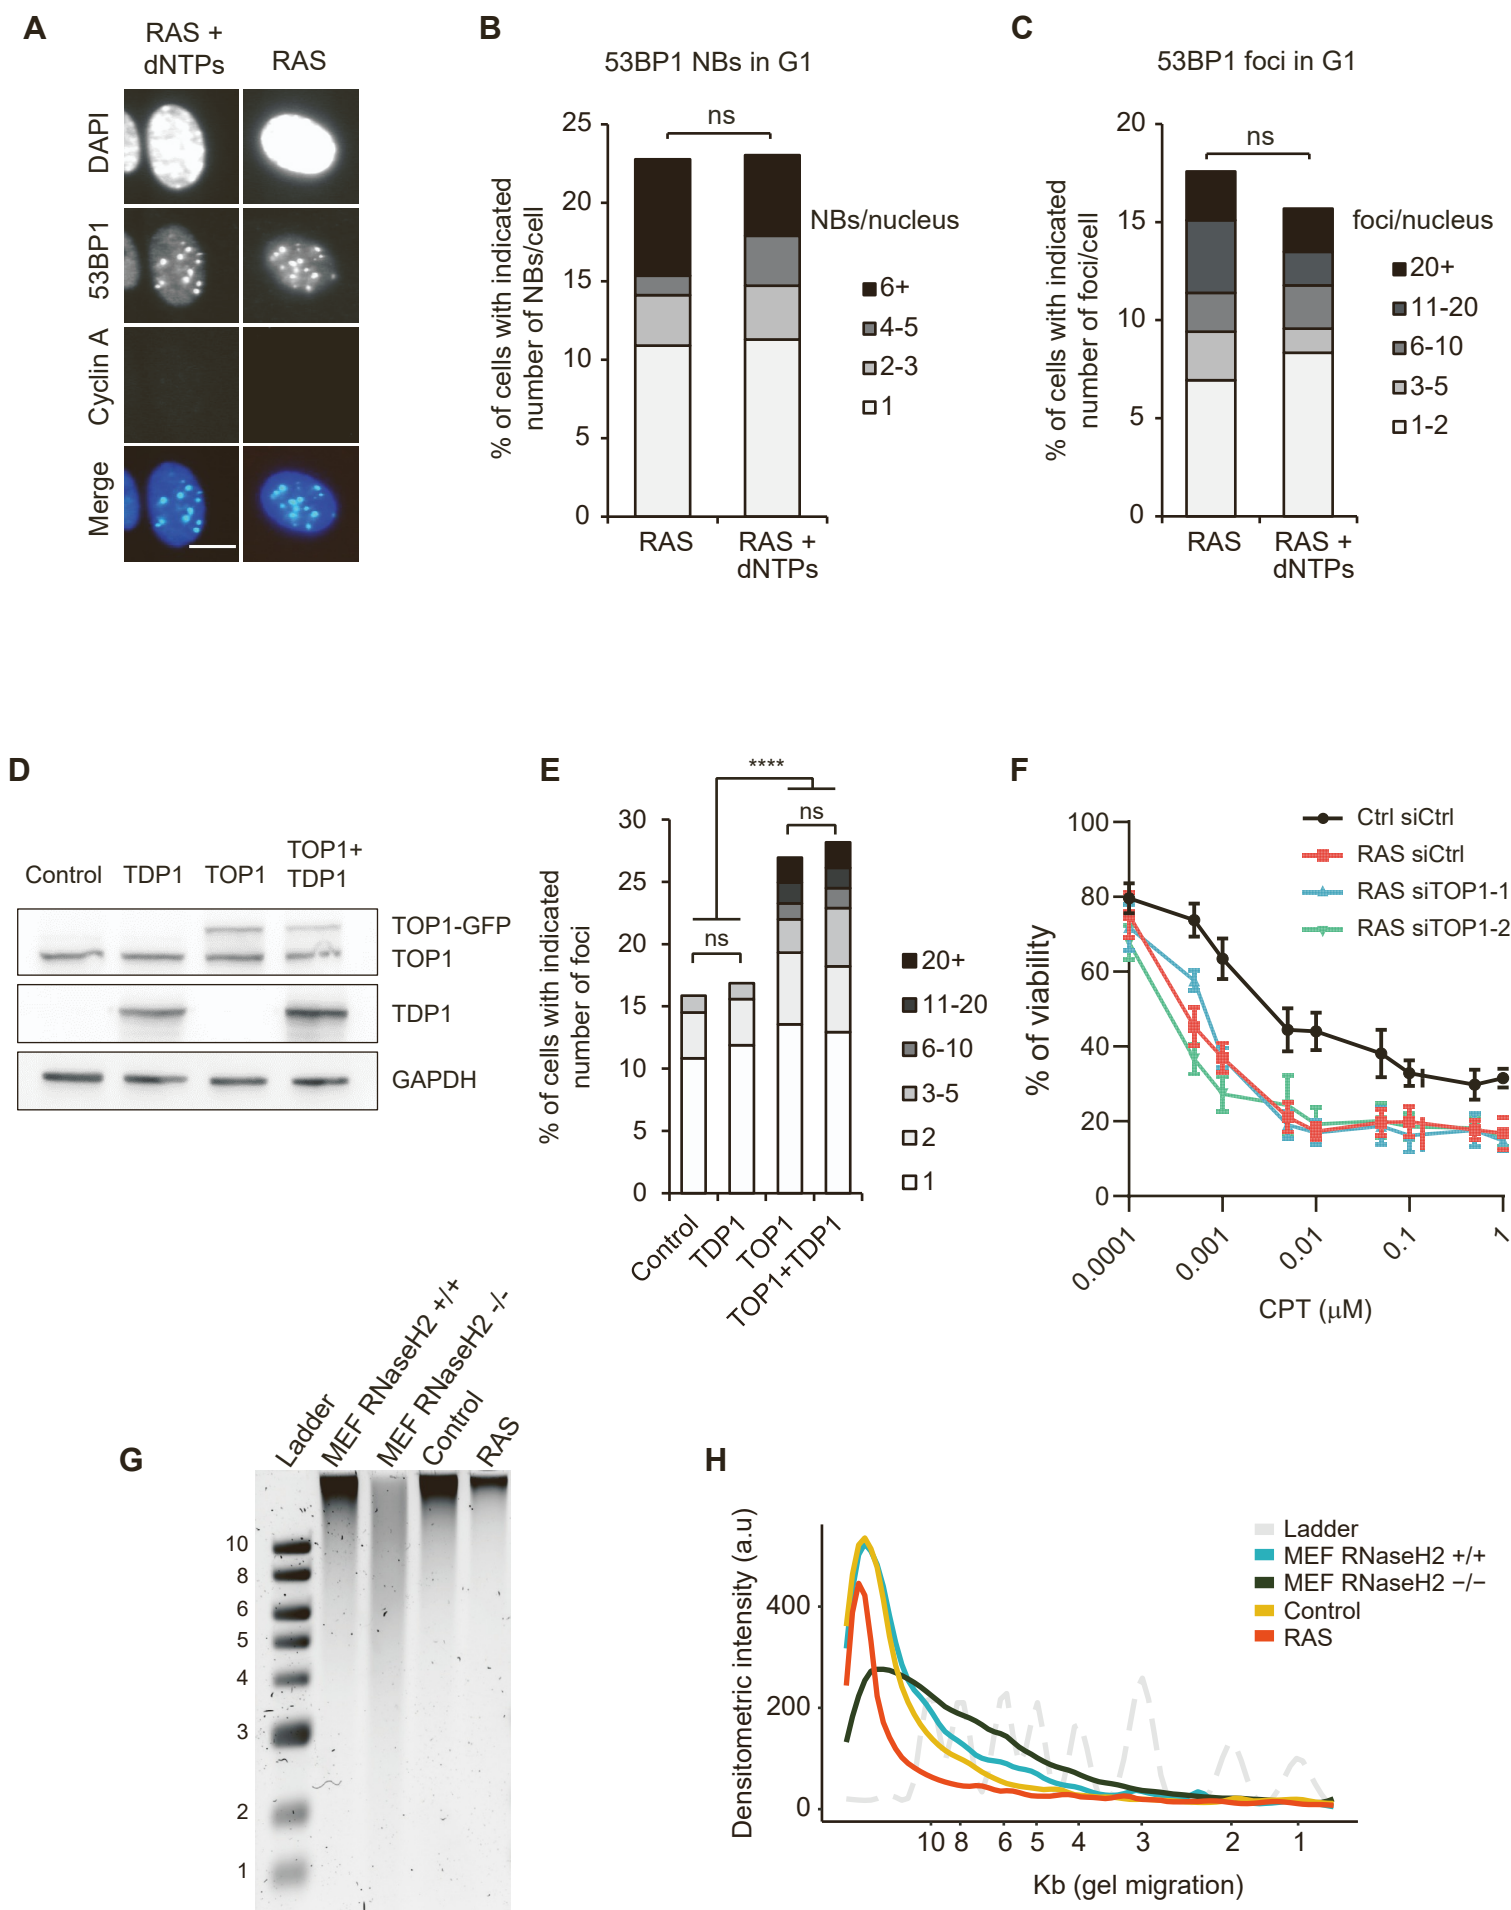

**Supplementary Figure 7. Related to Figure 7. DNA damage is induced by accelerated replication. (A)**

Representative images of 53BP1 NBs and foci (green) in cyclin A (red) negative cells and DAPI staining (blue) in FSE-hTert cells infected with ER:RAS and treated with 4-OHT for 5 days with (RAS + dNTPs) or without nucleoside supplementation (RAS). **(B,C)** Percentage of cells with indicated number of 53BP1 NBs ( $> 1 \mu\text{m}$  in diameter) **(B)** or foci ( $< 1 \mu\text{m}$  in diameter) **(C)** per nucleus in cyclin A negative RAS ( $n = 293$ ) and RAS + dNTPs ( $n = 273$ ) cells. Results are the summary of two independent experiments. Mann-Whitney rank-sum test. **(D)** Protein levels of TOP1, TDP1 and GADPH in HEK-293 cells transfected with a control GFP plasmid (Control), TDP1-GFP, TOP1-GFP, as indicated. **(E)** Percentage of cells with indicated number of 53BP1 foci in HEK-293 cells as indicated in **D**. At least 1000 nuclei per condition were analyzed. Data are the summary of two independent experiments.  $P$  values calculated by one-way ANOVA. **(F)** Cell viability assay for ER:RAS FSE hTert cells with (RAS) or without (Ctrl) 4-OHT treatment and siRNA treatment as indicated. Cells were treated with increasing concentrations of camptothecin (CPT), a TOP1 inhibitor. **(G,H)** Alkaline gel electrophoresis of RNaseH2 treated genomic DNA, **(G)** shows an increase in fragmentation for the RNaseH2<sup>-/-</sup> MEF clone compared with the RNaseH2<sup>+/+</sup> control MEF clone. No significant change is observed between ER:RAS FSE hTert cells with (RAS) or without (Control) 4-OHT treatment. **(H)** Quantification of the alkaline gel presented in **G**. ns – nonsignificant; \*\*\*\*  $P < 0.0001$ . Scale bar,  $10 \mu\text{m}$ .

Supplementary Figure 8

A

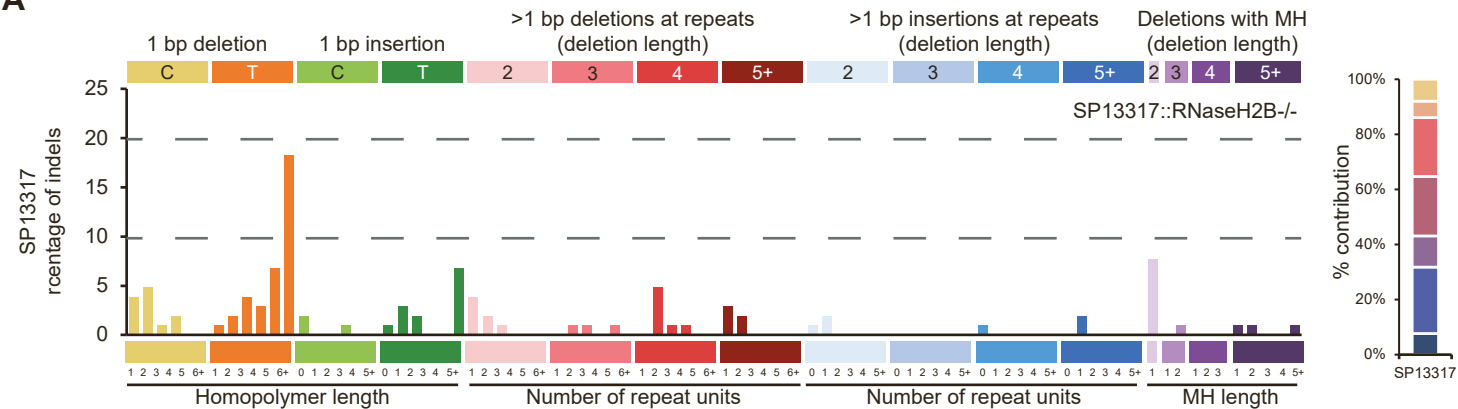

B

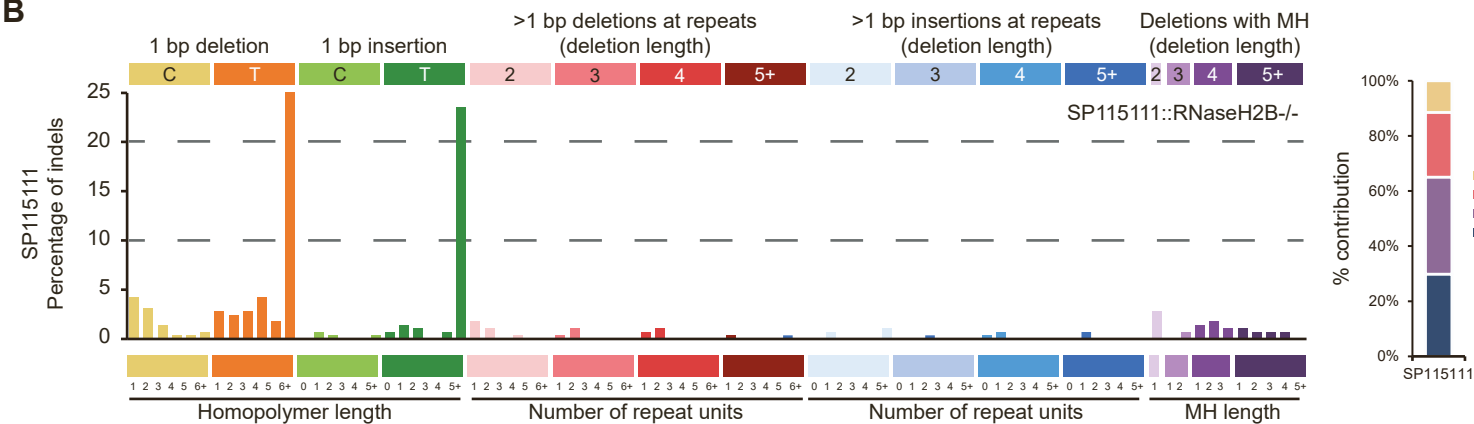

C

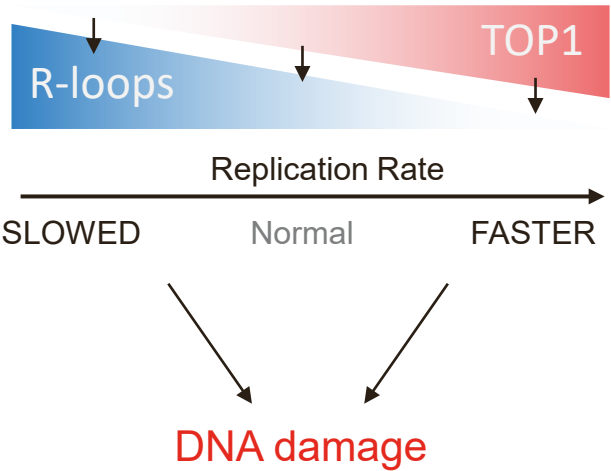



**Supplementary Figure 8. Related to Figure 7. Indel spectra of RNaseH2B null.** (A,B) Indel mutational spectrum of RNaseH2B<sup>-/-</sup> tumor samples. ID4 signature contributes to SP13317 (A), but no to SP115111 (B). (C) A model of TOP1 regulating R-loop levels promoting replication stress. Either excess or shortage of TOP1 affects R-loop homeostasis, replication dynamics and genome stability. Excess TOP1 reduces R-loop levels leading to accelerated replication and induces DNA damage; and shortage of TOP1 increases R-loop levels, which slows replication rate and induces DNA damage.
